# Supplementary material for: Untargeted metabolic analysis in dried blood spots reveals metabolic signature in 22q11.2 deletion syndrome
Source: PubMed Central journal article supplement (PMC8907226; doi:10.1038/s41398-022-01859-4), 2022-03-09

A) Full Scale IQ of 22q11.2DS patients

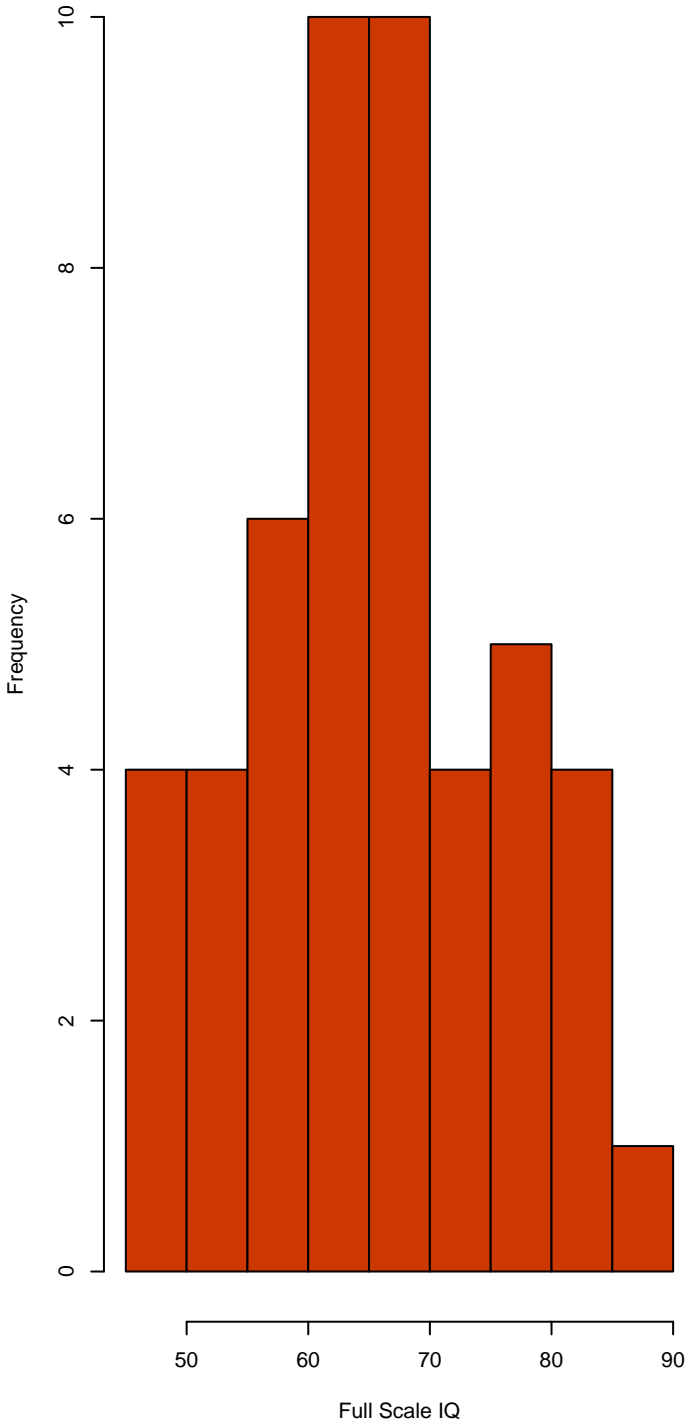

B) Verbal IQ of 22q11.2DS patients

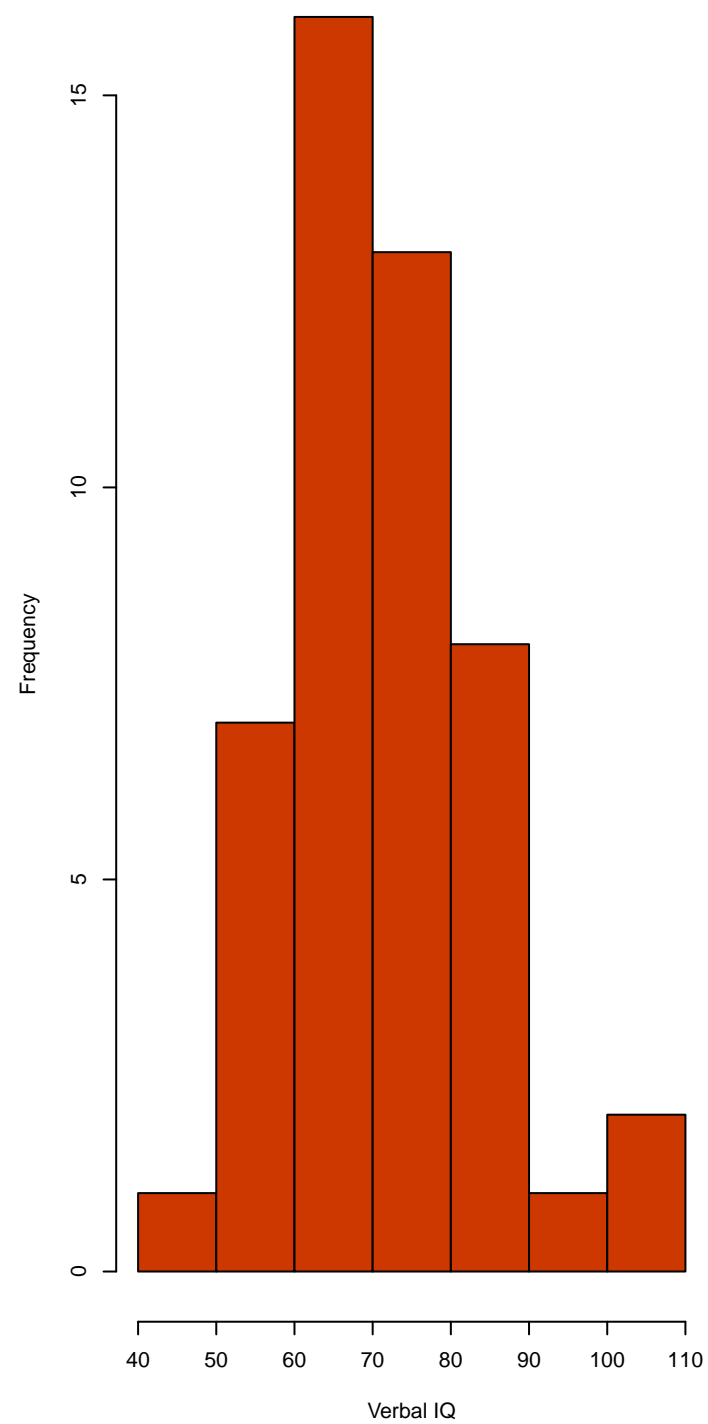

C) Performance IQ of 22q11.2DS patients

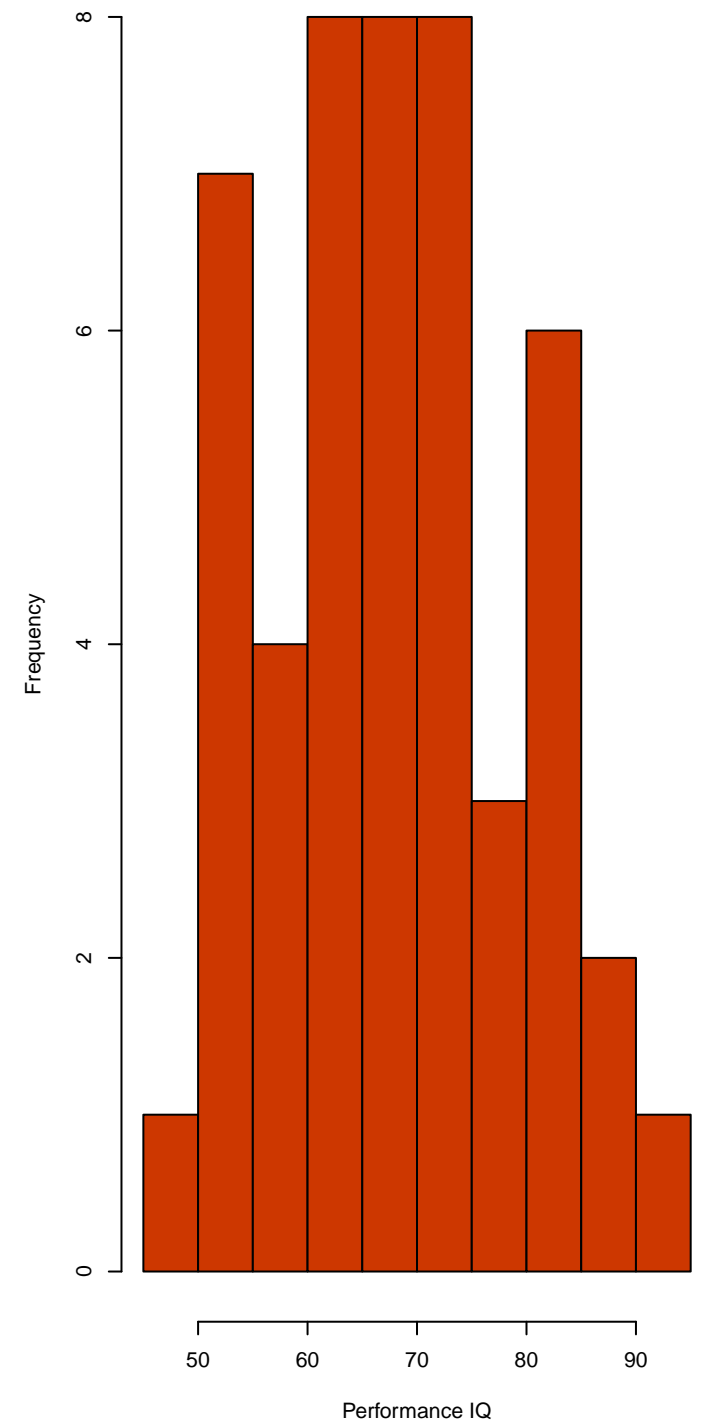

Supplement: 41398_2022_1859_MOESM2_ESM.pdf [file 41398_2022_1859_MOESM2_ESM.pdf]
