# Supplementary material for: Untargeted metabolic analysis in dried blood spots reveals metabolic signature in 22q11.2 deletion syndrome
Source: PubMed Central journal article supplement (PMC8907226; doi:10.1038/s41398-022-01859-4), 2022-03-09

PCA contribution plot for 22q11.2DS patients with a lower IQ from 22q11.2DS patients with a higher IQ; PC1

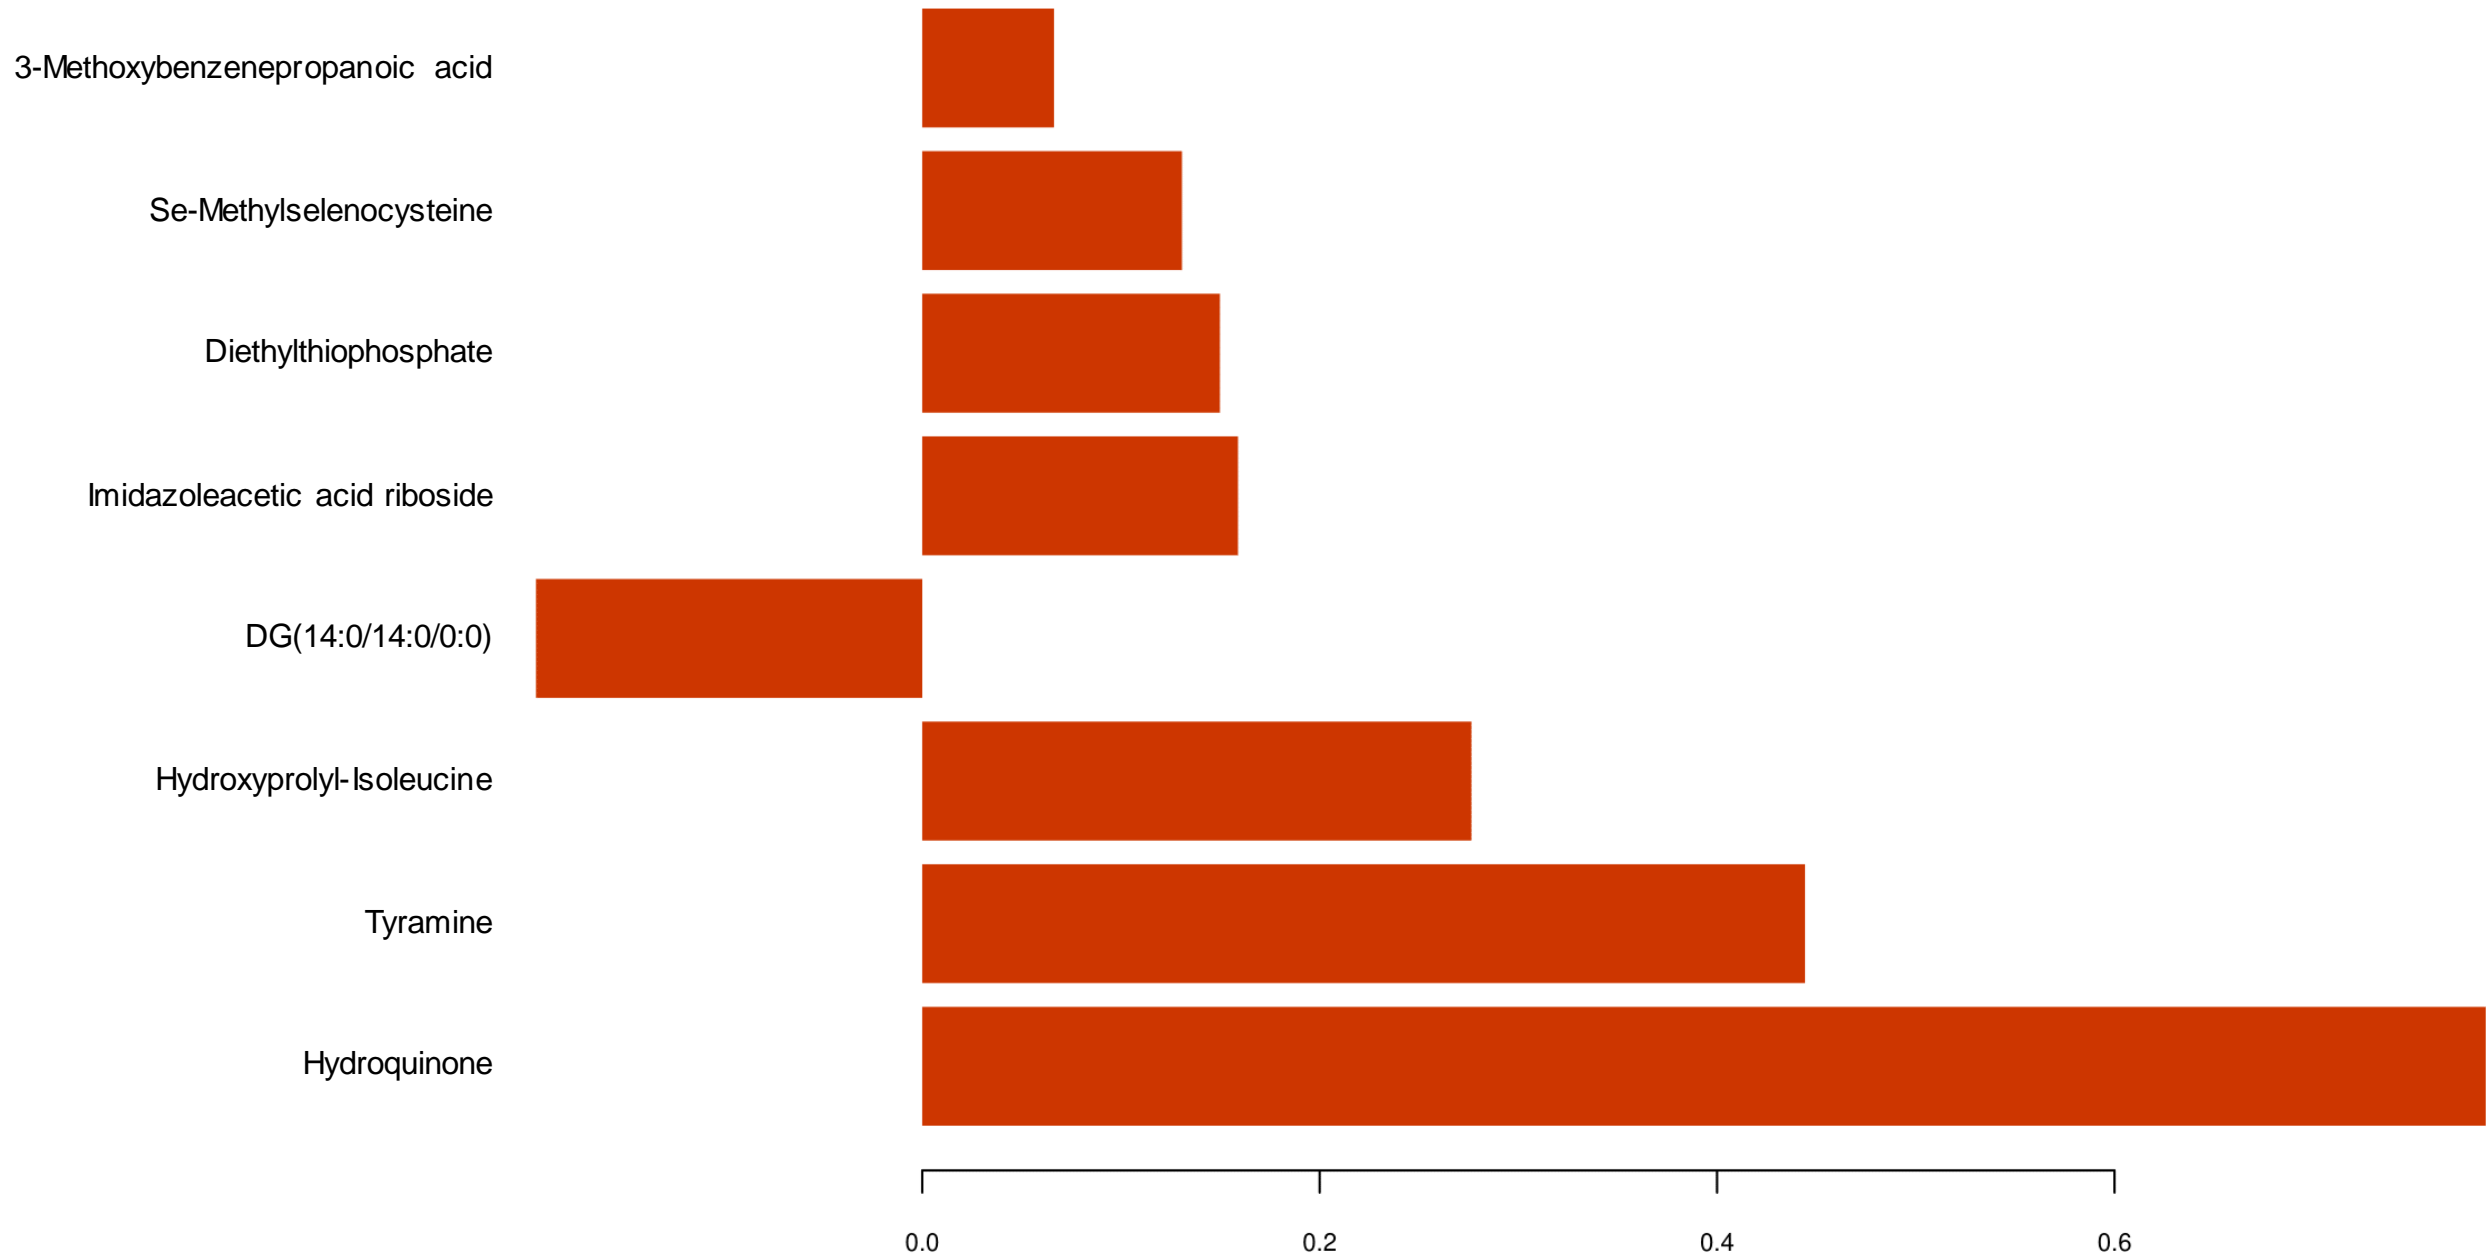

Supplement: 41398_2022_1859_MOESM7_ESM.pdf [file 41398_2022_1859_MOESM7_ESM.pdf]
